# Supplementary material for: Uncovering the relationship and mechanisms of Tartary buckwheat (Fagopyrum tataricum) and Type II diabetes, hypertension, and hyperlipidemia using a network pharmacology approach
Source: PeerJ. 2017 Nov 21;5:e4042. doi: 10.7717/peerj.4042 (PMC5701543; doi:10.7717/peerj.4042)
Supplement: Supplemental Information 3 [file peerj-05-4042-s003.xlsx]

## Sheet: Table S5
Supplementary Table S5 : Detailed information on eight existing protein-protein interaction databases.
Source Name	Website	Release number/ Last updated
The Biological General Repository for Interaction Datasets (BioGRID)	http://thebiogrid.org/	Version 3.4.125
Human Annotated and Predicted Protein Interaction Database (HAPPI)	http://discovery.informatics.uab.edu/HAPPI/index.php	Version 2
Human Protein Reference Database (HPRD)	http://www.hprd.org/	Release 9
High-quality INTeractomes (HINT)	http://hint.yulab.org/	Version 4
Molecular INTeraction Database (MINT)	http://mint.bio.uniroma2.it/	20110801
Online Predicted Human Interaction Database (OPHID)	http://ophid.utoronto.ca/	Version 2.3
Database of Interacting Proteins (DIP)	http://dip.doe-mbi.ucla.edu/dip/Main.cgi	20150101
Search Tool for the Retrieval of Interacting Genes/Proteins (STRING)	http://string-db.org	verison 10
