# Supplementary material for: Uncovering the relationship and mechanisms of Tartary buckwheat (Fagopyrum tataricum) and Type II diabetes, hypertension, and hyperlipidemia using a network pharmacology approach
Source: PeerJ. 2017 Nov 21;5:e4042. doi: 10.7717/peerj.4042 (PMC5701543; doi:10.7717/peerj.4042)
Supplement: Supplemental Information 4 [file peerj-05-4042-s004.xlsx]

## Sheet: Table S6
Supplementary Table S6: Prediction of putative targets for compositive compounds Fagopyrum tataricum.
Target	Source
ABCA1	BATMAN
ABCG1	BATMAN
ABHD5	BATMAN
ADIPOQ	BATMAN
AKR1B10	BATMAN
AKR1C1	BATMAN
AKR1C2	BATMAN
AKR1C3	BATMAN
AKR1C4	BATMAN
ALOX15	BATMAN
ALOX15B	BATMAN
ALOX5	BATMAN
ALOX5AP	BATMAN
ANAPC2	BATMAN
ANXA1	BATMAN
APOA2	BATMAN
ATP5A1	BATMAN
ATP5B	BATMAN
ATP5C1	BATMAN
AVP	BATMAN
AVPR1A	BATMAN
BDKRB2	BATMAN
CCM2L	BATMAN
CDC20	BATMAN
CHUK	BATMAN
COL1A1	BATMAN
CPLX2	BATMAN
DDC	BATMAN
DGKA	BATMAN
DHDH	BATMAN
DNAJA3	BATMAN
FABP3	BATMAN
FNDC5	BATMAN
HCK	BATMAN
HEG1	BATMAN
HIBCH	BATMAN
HSD17B2	BATMAN
IFNG	BATMAN
IKBKB	BATMAN
IKBKE	BATMAN
IL13	BATMAN
IL1B	BATMAN
INS	BATMAN
ITGAV	BATMAN
ITGB3	BATMAN
MAPK9	BATMAN
MECOM	BATMAN
METRNL	BATMAN
MPO	BATMAN
NAMPT	BATMAN
NAPRT	BATMAN
NCKAP1L	BATMAN
NDRG2	BATMAN
NEUROD2	BATMAN
NR1D1	BATMAN
NR1H2	BATMAN
NR1H3	BATMAN
NR1I2	BATMAN
OSBPL8	BATMAN
OXER1	BATMAN
PAWR	BATMAN
PIK3CG	BATMAN
PIM1	BATMAN
PLA2G2E	BATMAN
PNPLA2	BATMAN
PPARA	BATMAN
PPARG	BATMAN
PPP2CA	BATMAN
PPP2CB	BATMAN
PRDM16	BATMAN
PRKCA	BATMAN
PRKCB	BATMAN
PTGIS	BATMAN
PTGS1	BATMAN
PTGS2	BATMAN
PTPN2	BATMAN
RGCC	BATMAN
ROCK1	BATMAN
ROCK2	BATMAN
S100A8	BATMAN
S100A9	BATMAN
SEC14L2	BATMAN
SEC14L3	BATMAN
SEC14L4	BATMAN
SERPINB7	BATMAN
SERPINE1	BATMAN
SLC6A4	BATMAN
SNCA	BATMAN
STK17B	BATMAN
STX3	BATMAN
TNF	BATMAN
TOP2A	BATMAN
TPMT	BATMAN
TUBA4A	BATMAN
TUBB	BATMAN
UGT3A1	BATMAN
WNT11	BATMAN
