# Supplementary material for: Uncovering the relationship and mechanisms of Tartary buckwheat (Fagopyrum tataricum) and Type II diabetes, hypertension, and hyperlipidemia using a network pharmacology approach
Source: PeerJ. 2017 Nov 21;5:e4042. doi: 10.7717/peerj.4042 (PMC5701543; doi:10.7717/peerj.4042)
Supplement: Supplemental Information 5 [file peerj-05-4042-s005.xlsx]

## Sheet: Table S7
Supplementary Table S7 : Overlap of significantly targets in PT, T2D, HT and HL.
Gene Symbol	Unit	Uniprot ID	Description
AKR1C3	PT|HT	P42330	Aldo-keto reductase family 1 member C3
ANXA1	PT|HT	P04083	Annexin A1
DDC	PT|HT	P20711	Aromatic-L-amino-acid decarboxylase
MPO	PT|HT	P05164	Myeloperoxidase
PTGIS	PT|HT	Q16647	Prostacyclin synthase
PTGS1	PT|HT	P23219	Prostaglandin G/H synthase 1
PTGS2	PT|HT	P35354	Prostaglandin G/H synthase 2
TNF	PT|HT	P01375	Tumor necrosis factor
APOA2	PT|HL	P02652	Apolipoprotein A-II
CFTR	T2D|HT	P13569	Cystic fibrosis transmembrane conductance regulator
CHRNA2	T2D|HT	Q15822	Neuronal acetylcholine receptor subunit alpha-2
CHRNA3	T2D|HT	P32297	Neuronal acetylcholine receptor subunit alpha-3
CHRNB4	T2D|HT	P30926	Neuronal acetylcholine receptor subunit beta-4
CPT1A	T2D|HT	P50416	Carnitine O-palmitoyltransferase 1, liver isoform
GRIN3A	T2D|HT	Q8TCU5	Glutamate receptor ionotropic, NMDA 3A
KCNJ1	T2D|HT	P48048	ATP-sensitive inward rectifier potassium channel 1
KCNJ11	T2D|HT	Q14654	ATP-sensitive inward rectifier potassium channel 11
OPRD1	T2D|HT	P41143	Delta-type opioid receptor
OPRK1	T2D|HT	P41145	Kappa-type opioid receptor
OPRM1	T2D|HT	P35372	Mu-type opioid receptor
PGRMC1	T2D|HT	O00264	Membrane-associated progesterone receptor component 1
SIGMAR1	T2D|HT	Q99720	Sigma non-opioid intracellular receptor 1
SLC6A3	HT|HL	Q01959	Sodium-dependent dopamine transporter
PPARG	PT|T2D|HT	P37231	Peroxisome proliferator-activated receptor gamma
ABCA1	PT|T2D|HL	O95477	ATP-binding cassette sub-family A member 1
PPARA	PT|HT|HL	Q07869	Peroxisome proliferator-activated receptor alpha
SLC6A2	T2D|HT|HL	P23975	Sodium-dependent noradrenaline transporter
SLC6A4	PT|T2D|HT|HL	P31645	Sodium-dependent serotonin transporter
PT=Putative Targets
T2D=Type II diabetes
HT=HyperTension
HL=hyperLipidemia
