# Supplementary material for: Uncovering the relationship and mechanisms of Tartary buckwheat (Fagopyrum tataricum) and Type II diabetes, hypertension, and hyperlipidemia using a network pharmacology approach
Source: PeerJ. 2017 Nov 21;5:e4042. doi: 10.7717/peerj.4042 (PMC5701543; doi:10.7717/peerj.4042)
Supplement: Supplemental Information 6 [file peerj-05-4042-s006.xlsx]

## Sheet: Table S8
Supplementary Table S8: Four topological feature values of key targets in TB-compositive compound-putative target-known therapeutic target network.
Name	Degree	Betweenness	Closeness	Kcore
ABL1	7	2.32571	0.02	7
AKT2	10	3.9381	0.0212766	8
BCR	8	3.32333	0.0204082	7
CHUK	9	4.42991	0.0212766	7
HIF1A	10	2.93028	0.0217391	8
IFNG	11	4.52822	0.0222222	8
IKBKB	12	6.55529	0.0227273	8
IL13	9	3.86384	0.0208333	8
IL1B	19	29.84	0.027027	8
INS	11	5.21515	0.0222222	8
IRS1	12	9.14669	0.0227273	8
IRS2	9	6.61863	0.0212766	8
JUN	19	32.2037	0.027027	8
KIT	8	3.46338	0.0204082	7
LYN	8	5.58388	0.0208333	7
MMP2	9	0.678114	0.0212766	8
MMP9	10	1.05474	0.0217391	8
NOS2	10	2.04888	0.0217391	8
NOS3	14	8.34498	0.0238095	8
PPARA	14	11.9793	0.0238095	8
PPARG	17	18.2051	0.025641	8
PPP2CA	8	5.56944	0.0208333	7
PRKCA	8	4.72048	0.0204082	7
RAF1	8	4.21411	0.0204082	7
SRC	19	36.5241	0.027027	8
TNF	11	8.01149	0.0222222	8
UNPD28717	9	2.61468	0.02	8
VCAM1	12	6.9096	0.0227273	8
VEGFA	15	13.1589	0.0243902	8
